# Supplementary material
Source: PubMed Central journal article supplement (PMC4573840)
Supplement: NIHMS705999-supplement-2.pdf [file NIHMS705999-supplement-2.pdf]

## Supplemental Inventory:

Figure S1. This figure supports Figure 1 and shows marker localization in E14.5 skin and sorted cell populations by immunofluorescence and qRT-PCR.

Figure S2. This figure supports Figure 2 and shows consistent gene expression patterns are maintained after cDNA amplification, prior to library manufacture. It also shows quality metrics of the RNA-sequencing.

Figure S3. This figure supports Figure 5 and shows additional new signature genes identified for all isolated cell types, verified by qRT-PCR analysis and immunofluorescence staining.

Figure S4. This figure supports Figure 6 and shows additional heat maps of select signaling pathways for which factors are expressed in heterogeneous cell types.

Supplemental table legends.

Supplemental experimental procedures. These procedures include information on RNA-sequencing and computational analyses. Primers are listed for qRT-PCR.

**Figure S1**

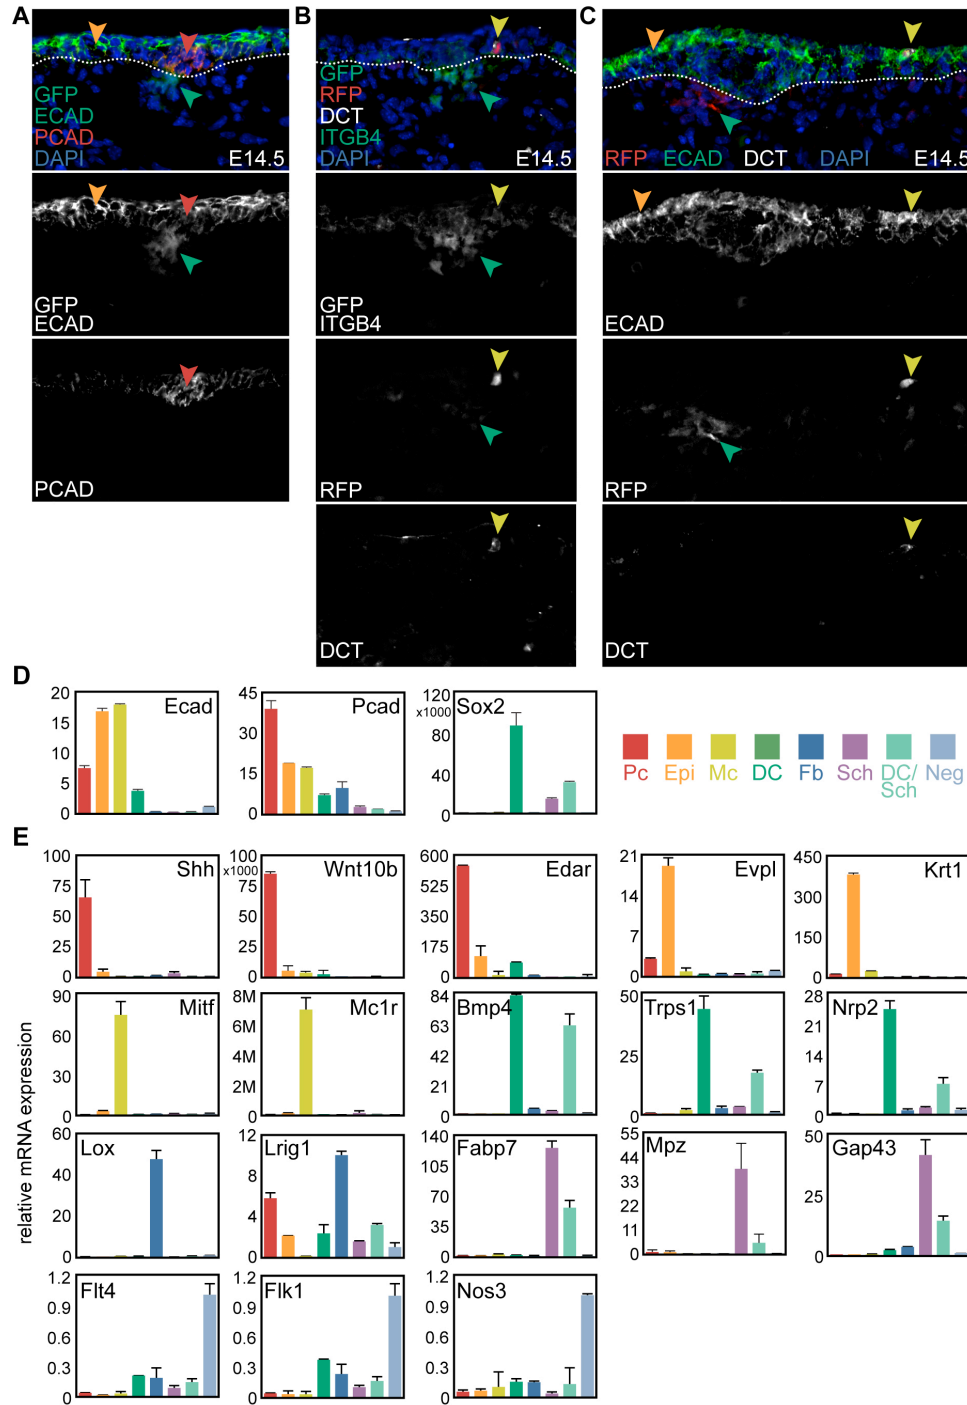

**Figure S1.** Supports Figure 1 data. Reporter/antibody labeling of embryonic skin and marker gene verification in target cell types. Color key indicates samples associated with each arrowhead/bar. (A) Co-staining of ECAD and PCAD on Sox2<sup>GFP</sup> skin. Note ECAD and GFP are both depicted in the green channel. (B) Co-staining of ITGB4, which marks the basement membrane and DCT, which marks melanocytes, on Sox2<sup>GFP</sup>/Lef1-RFP skin. Note ITGB4 and GFP are both depicted in the green channel. One melanocyte is seen sitting in the epidermal compartment. (C) Co-staining of ECAD and DCT on Lef1-RFP skin. Note ECAD<sup>+</sup>RFP<sup>+</sup>DCT<sup>+</sup> melanocyte. (D) Markers used to isolate cells were confirmed enriched in the appropriate sorted cell types by qRT-PCR analysis. Data are mean  $\pm$  SD from 2 measurements. (E) Confirmed enrichment of additional known markers for each sorted cell type by qRT-PCR analysis.

**Figure S2**

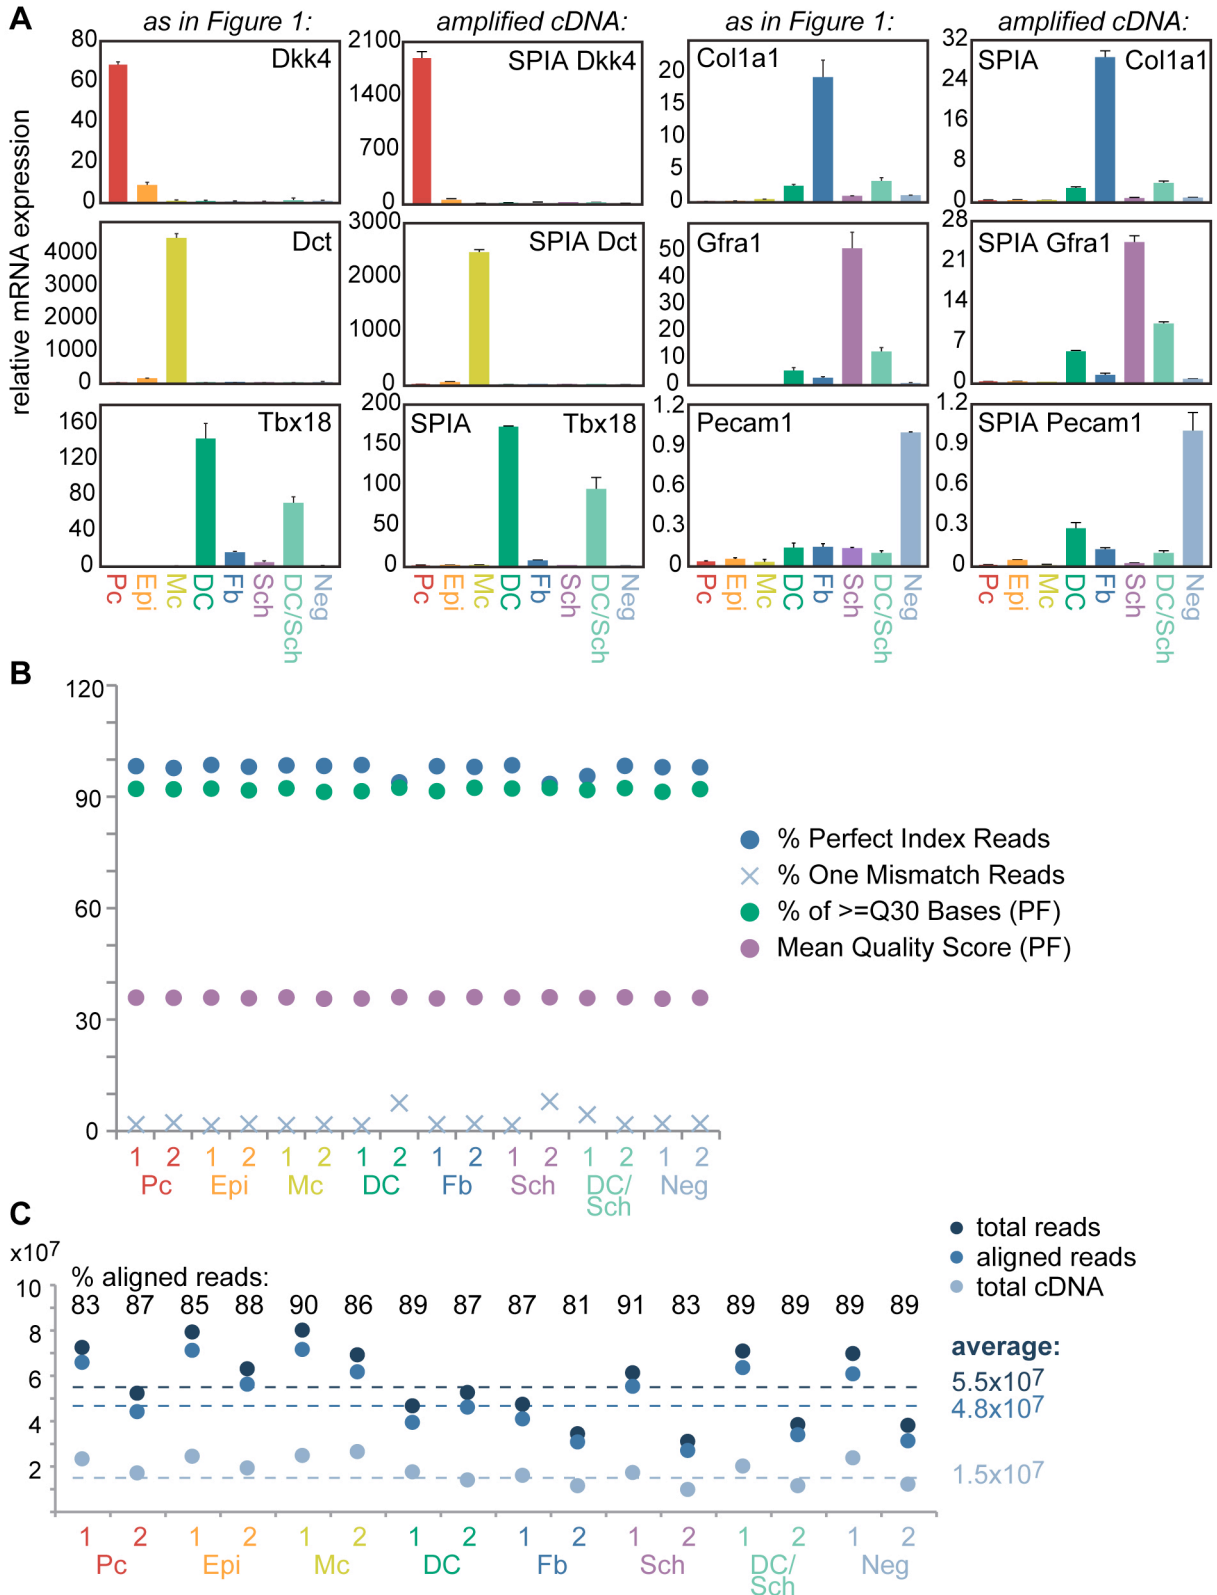

**Figure S2.** Supports Figure 2 data. Validation of RNA-sequencing methods and results.  
 (A) qRT-PCR on NuGEN-amplified cDNA (SPIA samples) reveals gene expression patterns mirror those found with qRT-PCR on conventional cDNA manufactured with Invitrogen SuperScript III.  
 (B) % Perfect Index Reads and Mean Quality Scores for each of the 16 samples after RNA-sequencing.  
 (C) Total reads, aligned reads, and total cDNA for each of the 16 samples after RNA-sequencing.

**Figure S3**

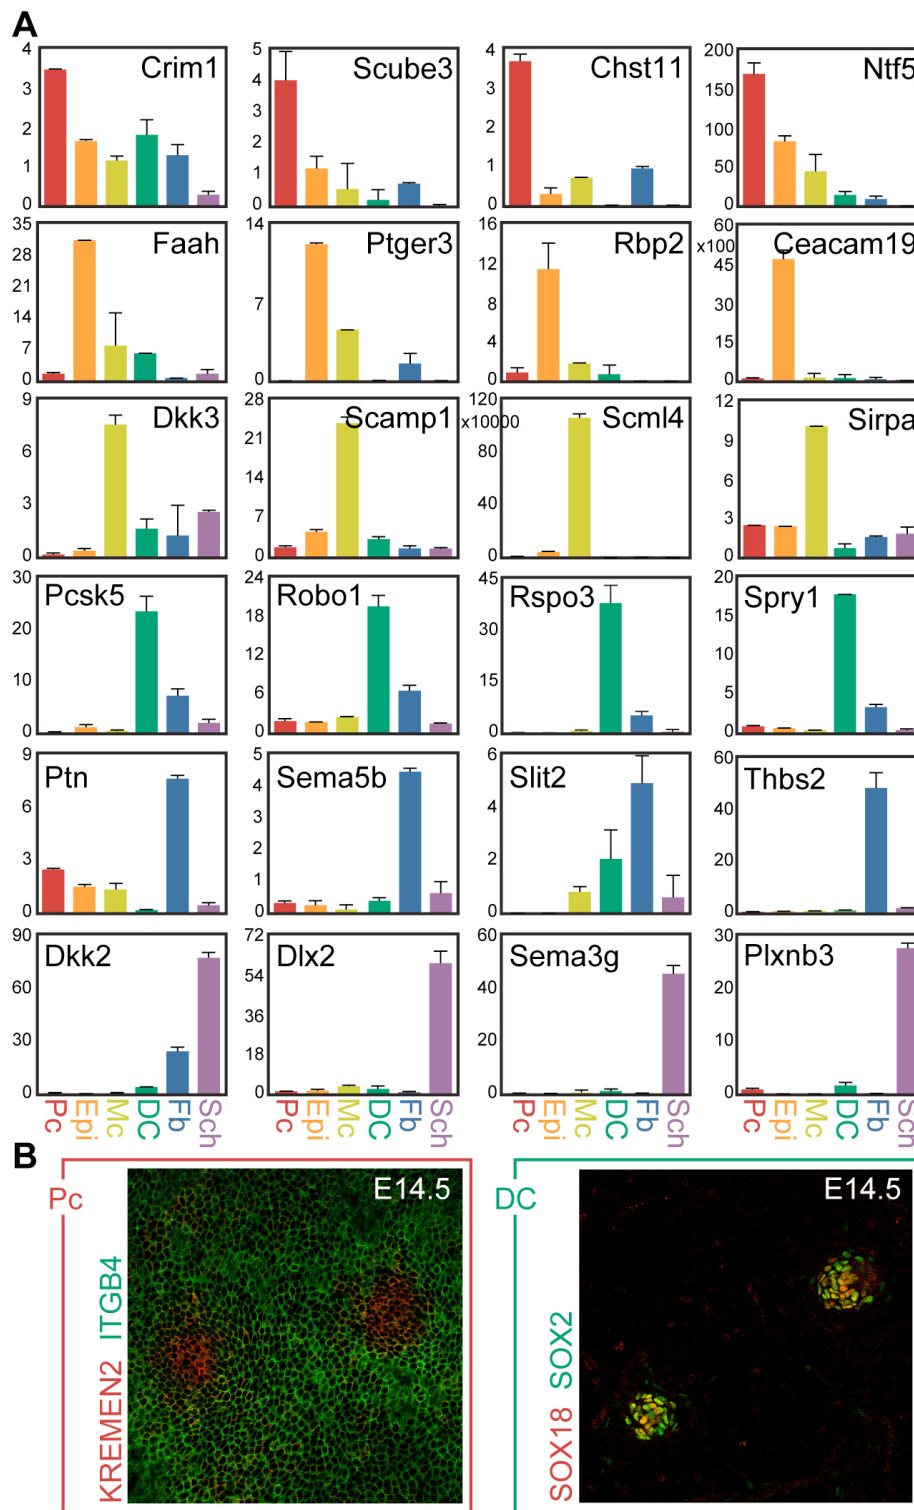

**Figure S3.** Supports Figure 5 data. qRT-PCR and immunofluorescence verification of signature genes.

(A) qRT-PCR verification of select signature genes for each cell type. Data are mean  $\pm$  SD from 2 measurements.

(B) Immunofluorescence staining verification of selected signature genes for the Pc and DC. Whole-mount view of E14.5 skin.

**Figure S4**

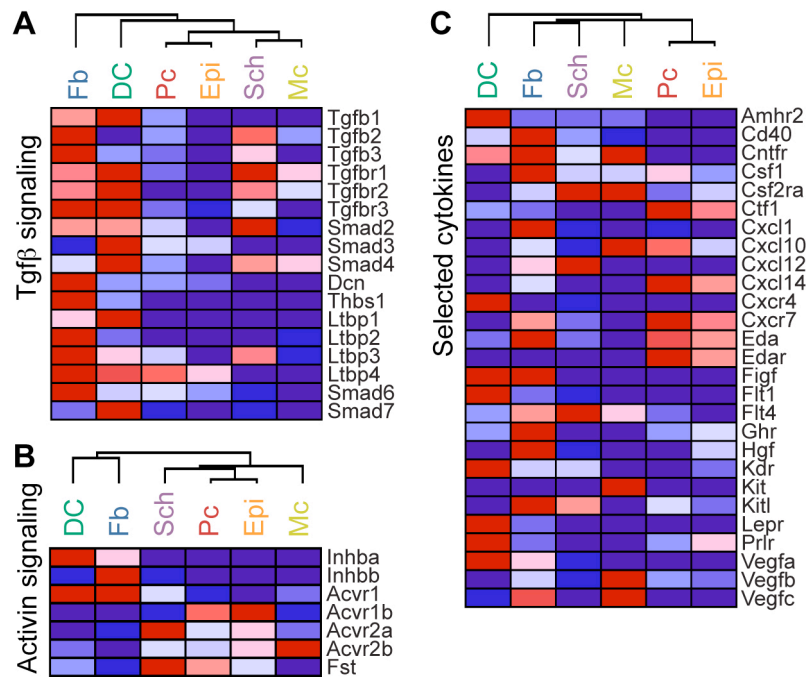

**Figure S4.** Supports Figure 6. Multiple signaling factors are specifically expressed by distinct cell types in embryonic skin.

Genes involved in Tgfβ (A), Activin (B) and cytokine (C) signaling were mined from the KEGG database and represented in a heat map if expressed (FPKM >1) in embryonic skin.

## SUPPLEMENTAL TABLE LEGENDS

**Supplemental tables available as .xls:**

**Table S1.** Supports Figure 4. Signature gene lists.

**Table S2.** Supports Figure 4. Enriched genes in epithelial (Pc + Epi), dermal (DC + Fb), and neural crest (Sch + Mc) cells.

**Table S3.** Supports Figure 4. Results of Enrichr GO analysis.

**Table S4.** Supports Figure 4. Overlap between embryonic cell signatures and signatures of their adult cell counterparts.

**Table S5.** Supports Figure 6. Results of Enrichr KEGG analysis.

## **SUPPLEMENTAL EXPERIMENTAL PROCEDURES**

### **RNA-sequencing analysis**

All raw RNA sequencing reads were mapped to the mouse genome (mm10) with TopHat v2.0.3 (Trapnell et al., 2009) coupled with the Bowtie2 (Langmead and Salzberg, 2012) aligner with default parameters. Transcriptomes were assembled and fragments per kilo-base per million reads (FPKM) for each gene were computed with Cufflinks v2.1.1 (Trapnell et al., 2010) with default parameters. Differentially expressed genes (DEGs) were identified using Cuffdiff (with default parameters except for the library normalization method was upper quartile normalization, where FPKMs were scaled via the ratio of the 75 quartile fragment counts to the average 75 quartile value across all libraries) and ANOVA, and the Fisher exact test was used for enrichment analysis with the Benjamini-Hochberg correction for multiple hypotheses testing with FDR significance cut off  $q < 0.05$ . Hierarchical clustering analyses for samples were performed with an FPKM matrix of either all detected genes or DEGs. The FPKM matrix was  $\log_{10}$  transformed and standardized across each gene using z-scores so that the relative gene expression values across samples were 0 centered. Hierarchical clustering was performed for both genes and samples with Euclidean distance and average linkage functions. Principle component analyses (PCA) were performed for samples with the scikit-learn Python package and visualized in 3D plot using the Matplotlib Python package. Gene ontology enrichment analysis was carried out using Enrichr (Chen et al., 2013). Heatmaps were generated by integrating data from the KEGG pathways database (Kanehisa and Goto, 2000; Kanehisa et al., 2014) and with Genepattern (Reich et al., 2006). KEGG pathway enrichment analysis was performed with Enrichr (Chen et al., 2013).

### **Accession numbers**

RNA-seq data have been deposited at the NCBI-GEO under the accession number GSE00000.

**Primer list for qRT-PCR:**

| <b>Gene</b> | <b>Forward primer (5' to 3')</b> | <b>Reverse primer (5' to 3')</b> |
|-------------|----------------------------------|----------------------------------|
| Ascl4       | CGTCGCTGTGCTAAAAAGGACA           | AGACAAAAGGGCAAGAGAAACAGTG        |
| Bmp4        | TCCACTGGCTGATCACCTCAAC           | AGTCCAGCTATAGGGAAGCAGTTTG        |
| Bmp7        | CCCAGCTCAACGCCATCTCT             | TTCCGGTTGGGGAGGTGAG              |
| Cd274       | TAGGTTTTCTCCCCATCCTTCT           | CAAGTGAGGCGTCTGTGTTTGAG          |
| Ceacam19    | ATCACTTTCCCTCCAGACTCCAG          | AGAAGCCCCATTTTACTCACAGC          |
| Chst11      | CAACCCCAAAGTCCCTTGATGAAA         | GCCTTCGCTAGCACTGGAAAGT           |
| Col1a1      | GTGGGAGGGAACCAAGATTG             | GCAACAGTCGCTTCACCTAC             |
| Crim1       | AAGCCAGGGAGATGGAAAGC             | AGTGTAGCCCCTGGAAATGC             |
| Ctgf        | TGGGGACAATGACATCTTTGAGTC         | TTCTCCCACGGTAGTTAAAAACAC         |
| Dab1        | GGTCCCAAGAACTAGACAGCAAGAA        | GACCCCATAGCCACTGAAGTTGA          |
| Dcc         | GATGGCCTGTCTGGGTTTCA             | CATGGGATGGAAGGTTGCCT             |
| Dct         | AGCAGCCAACGACCCTGTGT             | CCTTTGCGAAGCCTTCTGTATTG          |
| Dkk2        | CTAAAACATGGGGAACGCTGAAG          | CAACTTGGCCAGGACTACTGATTG         |
| Dkk3        | GGGGCTGTGCTAGCATTGATACT          | CTGGGCATTCTACAAGACTGC            |
| Dkk4        | CTAACGTGCCGAAGTCAGGTG            | GGAGATTGGGCTTTATTTATGTGC         |
| Dkk11       | CCCATGGACTTCCGAGACCTT            | CGGGGGCTCTTTTGCTTCTAC            |
| DIk1        | TGGCTGTGTCAATGGAGTCT             | TTCTCCAGGTCCACGCAAGT             |
| Dlx2        | GGCCACTTTTAGGCCATCCT             | TCACGGGGGTAGGTGATAGG             |
| Dpt         | GAATATGAGGGCCAGGAAAACCT          | GTGCCATGGGAAAGGGAGAAT            |
| Dsc1        | CAGGAGGAAGAAGGGCTAGAGTTTT        | GAGAATTTGGGGAGCTATGATTGG         |
| Ecad        | GCTGCCCCGAAA ATGAAAAG            | AAGACCGGCTGGGTAAACTCTG           |
| Edar        | AGGCTGCCCTAAGTAGTTCATTGAG        | ATAGGGCATGCCAGCAAACC             |
| Enpp2       | CGCCCTGATGTCCGTGTATCT            | ACGGCTAGTCTTCCGGTAGAAATC         |
| Ephb3       | TACGGCTCAATGACGGACAGTT           | TAGGTGGGGTCTGATGGGTCAT           |
| Erb3        | GTTAGGGGGCGTTTACATTGAGA          | ACTGAGGGGCACAGATGGTCTT           |
| Evpl        | GCTGCCGCAAAGATCCTCTAA            | GAGCCCAACACCACAAACGAT            |
| Faah        | CTATAAAGCAGAAGTCCCTGGGTATG       | TTGGTAAAGTGTCTGGCAAACAGTAG       |
| Fabp7       | TCATAACAGCGAACAGCAACGATATC       | GGGAAACGTGACCAAACCAACT           |
| Fgf10       | ATTTCCCCTGTATGCATCCTAAC          | TTCCCACGGAGGCAGAACTC             |
| Fgf20       | ACGCCGCATGTCTCTGGATAA            | AAAGTCCCATCTCAGTGTGGTGTG         |
| Flk1        | GTGGCGTTTCTACTCCTAATGAGA         | CACCCAGCAGAAACCCTGAGTT           |
| Flt4        | GAAGGGCGGACATGACACAAC            | GCCCCTGAAGCTTTCCTTGAC            |
| Fmn1        | CTATTGGACCCAGATACCCTTTACCT       | TTCCCCTCTTTGCCTGAGTGAT           |
| Foxi3       | AACTCCATCCGCCACAACCTAT           | CTGCCCTTCTGATTTTGATGTCC          |
| Gap43       | ATGTGCCTGCTGCTGTCACTG            | CTCGCCATAACAACACCAAGAAAC         |
| Gapdh       | CGTAGACAAAATGGTGAAGGTCGG         | AAGCAGTTGGTGGTGCAGGATG           |
| Gas7        | TCCTGCCTGTATGCTGGTTCAC           | GGTGGGGTGGAAAACACATTG            |
| Gfra1       | ACAGCGCTTCTGGCAGTTGATA           | TGCTGGCCCTCTAGATCCATAAC          |
| Grem1       | CAGGGCTGTAGTTGGCTTTGTCATT        | CTTACACCCGCGGTCAAGTGAAT          |
| Grhl3       | GATCGGTTCTGACGTTCACTGTTT         | GTGCCGAGGAAGTCAATAAGAAAGT        |
| Hhip        | TCAGTAACGGCCCTTTGGTTG            | TGGGCAGGTTGAACTGTGACTC           |
| Irx1        | TCTCGCAGATGGGCTCTCAGTAT          | TTTGGTGGGGTACGGGTTCTT            |
| Krt1        | TTACTCCCGAGGGACCAAATAAAG         | TGTTACCATGGGACTCAGACTGCT         |



|        |                           |                            |
|--------|---------------------------|----------------------------|
| Krtdap | CAACAGAGGGCCTTAACAATGAGTT | TCCATGCTTGCCTCCTCTTCTAC    |
| L1cam  | AGGCCACAGTTTGAGGGAAAAG    | CAGGCTAGCCAGGGAGAAAGAA     |
| Lox    | TGAGGAAGGGCCAAACATCTAAC   | CGTGGGATCGAATAGCAACAAG     |
| Lrig1  | ACGTGAGGCCTTCAATCAGC      | AAGGGAACATACTTGGCGAG       |
| Mc1r   | AGGGGAGGCTGTTGGCTTATC     | CGGGACCGTGGTTTCCTAAAT      |
| Mitf   | CACTGGGGAGAAGTTGATGTTGATA | AGTGCTGCGGACCATACAGAAA     |
| Mpz    | AGATGGAGCTTCGCAAAGATGAG   | ACCTAGACCCGGGAAAAAGAGG     |
| Myo7a  | ACTGGCCCCTGTCATAAGCACTA   | TAGCAGGGACCCACCACATAACT    |
| Ndnf   | TGGTACCCAATGCCATGTGTAGA   | CTTAGTGGGCCTGGGTCTCATT     |
| Nos3   | CCGGAAAGAGGGATTGTGTCA     | GCCGGAGGAACCTTCAAGATT      |
| Nrp2   | GGAGGCATGACCGATTGTGTC     | TGGCCTGTCTGTCTGTCCAT       |
| Ntf5   | TCTCCCGGAGGAACTTGACATTA   | GTGCCAGGCAACCAGAAACAG      |
| Ovol1  | ATGTGAACAGCCCGGTGTATGT    | AACCAGTGGGGGTGGAGAAA       |
| Pcad   | AGTGGGGAAGTCGATTCAAGAAAC  | AGGCGGGAGACCTTTAGACATTC    |
| Pcsk5  | GGCCGAAAGTGGAAGAAACC      | GCACGGGAAGTCCTGACAATAAC    |
| Pecam1 | TGTTGCTGGGTCATTGGAGGTCA   | TTGTCAAGCGAAGGATAGATAAGA   |
| Plp1   | GGACGGCGAAGTTGTAAGTGG     | TGTTGTATGGCTCCTGGTGTTTG    |
| Plxnb3 | TAAGGTCCCAGATGGAGCAACA    | GGGTGCCCTTCATTGAAAGTAAG    |
| Ptger3 | GACCATCAAAGCCCTGGTGT      | CTTCAGGTTGTTTCATCATCTGGCA  |
| Pthlh  | CCCAGCTTAAGGACGCATTGA     | CAGTTTCCTGGGGAGACAGTTTG    |
| Ptn    | CTTGGGGAGAATGTGACCTCAATAC | GTGGCGTCTTTTAATCCAGCATC    |
| Rbp2   | TTCCGCAACTACGACCTGGATTTCA | TTTCCCGTGCCCATCACTTCTTTTT  |
| Robo1  | CTCGGAATTGCCAAGTGATGC     | TTGTGGGGGTCAAGCCTGATA      |
| Scamp1 | TGTTACTGCAGCCATGAGACGAG   | CACGCACCTACACAATACACAAACAT |
| Scml4  | ATCAGGCAGTTCCACATACAGAA   | TTATTAGAGGCCTCCCCTGACTTG   |
| Scube3 | GACATGCATTGAAACCTGTGCT    | TGTTTAAGCGGCACTCGTCT       |
| Sema3g | TGGGTGTATGGGTGGCTCTA      | GCCTCCACCTTCTCTCACAC       |
| Sema5b | ACCCCTATGGAATTCAGACTGA    | CTTACTGGCTAGGCAGCAAGTTCTT  |
| Shh    | ACGAGGATGGAGCCTGTAGTTTGT  | GGGTGTGTGTGGCACGCTTTATTT   |
| Sirpa  | CCATGTTCTTGGGCTGTCTTCTAA  | AGGGCGCTTCTGTTCTTCTTTT     |
| Slit2  | CTATCTGCCACATGTCTCACAAG   | GACCCTGGGGTTTTACTGAAAGA    |
| Sox2   | TACTGGCAAGACCGTTTTCTGTG   | TATTGGAATCAGGCTGCCGAG      |
| Spib   | AGTCTTTTCCGTTCAAGTGCTACAG | GTTTTAAGGGCCTCTTCATCGTC    |
| Spry1  | TTCCCAGCCTTCTCCTTACAGC    | CAGGGGCAAATCAGACAGGAAT     |
| Tbx18  | ATGGCCTCCAGAATGCGTATG     | TGTCCCCCATCAAGCCTGTT       |
| Thbs2  | GCAGTGCGCCTTTACTTTATGGT   | ATAGTCCCACGCTTCTGTTTCA     |
| Trps1  | AGCCCAGGGTTCATTGACTAAAAG  | AAGCCAGGCACATGACTCAAGTAG   |
| Tyr    | AGCGGGTAAGAGCACTGACTGTT   | GCCCAAGAGCCAAAGGAATG       |
| Tyrp1  | CAAGGCCACCACAAAGTCACAG    | CGCAGGCCTCTAAGATACGAGAA    |
| Wnt10b | GAACAGCTCTGGGGGTGTAG      | GTTCTGGGCTGTAGTGGAGG       |

## SUPPLEMENTAL REFERENCES

Chen, E.Y., Tan, C.M., Kou, Y., Duan, Q., Wang, Z., Meirelles, G.V., Clark, N.R., and Ma'ayan, A. (2013). Enrichr: interactive and collaborative HTML5 gene list enrichment analysis tool. *BMC Bioinformatics* 14, 128.

Kanehisa, M., and Goto, S. (2000). KEGG: Kyoto Encyclopedia of Genes and Genomes. *Nucleic Acids Res.* 28, 27–30.

Kanehisa, M., Goto, S., Sato, Y., Kawashima, M., Furumichi, M., and Tanabe, M. (2014). Data, information, knowledge and principle: back to metabolism in KEGG. *Nucleic Acids Res.* 42, D199–205.

Langmead, B., and Salzberg, S. (2012). Fast gapped-read alignment with Bowtie 2. *Nat. Methods* 9, 357–359.

Reich, M., Liefeld, T., Gould, J., Lerner, J., Tamayo, P., and Mesirov, J. (2006). GenePattern 2.0. *Nat. Genet.* 38, 500–501.

Trapnell, C., Pachter, L., and Salzberg, S.L. (2009). TopHat: discovering splice junctions with RNA-Seq. *Bioinformatics* 25, 1105–1111.

Trapnell, C., Williams, B., and Pertea, G. (2010). Transcript assembly and quantification by RNA-Seq reveals unannotated transcripts and isoform switching during cell differentiation. *Nat. Biotechnol.* 28, 511–515.
